# Supplementary material
Source: MDPI journal article supplement (https://www.mdpi.com/2073-4344/11/7/787)
Supplement: s1 [file s1]

## Supplementary data

### Article

# *In Vitro* Digestibility and Antioxidant Activity of Plant Protein Isolate and Milk Protein Concentrate Blends

Mohammadreza Khalesi and Richard J. FitzGerald \*

Department of Biological Sciences, University of Limerick, Ireland; Mohammadreza.khalesi@ul.ie (M.K.); dick.fitzgerald@ul.ie (R.J.F.)

\* Correspondence: dick.fitzgerald@ul.ie

**Table 1.** Moisture, protein, ash and lipid content along with reconstitution pH (0.05% (w/v) on a protein basis) of soy, rice and pea protein isolates and milk protein concentrate.

| Sample | Moisture                | Protein                 | Ash                    | Lipid                  | pH                     |
|--------|-------------------------|-------------------------|------------------------|------------------------|------------------------|
|        | (%)                     |                         |                        |                        |                        |
| SPI    | 5.6 ± 1.6 <sup>b*</sup> | 81.1 ± 0.8 <sup>b</sup> | 5.5 ± 0.3 <sup>a</sup> | 1.8 ± 0.1 <sup>b</sup> | 7.2 ± 0.1 <sup>b</sup> |
| RPI    | 1.6 ± 0.4 <sup>a</sup>  | 80.0 ± 0.9 <sup>b</sup> | 5.5 ± 0.3 <sup>a</sup> | 9.7 ± 0.4 <sup>d</sup> | 6.1 ± 0.0 <sup>a</sup> |
| PPI    | 3.9 ± 0.0 <sup>b</sup>  | 71.0 ± 0.3 <sup>a</sup> | 6.5 ± 0.5 <sup>b</sup> | 8.1 ± 0.2 <sup>c</sup> | 8.0 ± 0.1 <sup>c</sup> |
| MPC    | 4.8 ± 0.0 <sup>b</sup>  | 84.2 ± 0.8 <sup>c</sup> | 7.0 ± 0.2 <sup>b</sup> | 1.3 ± 0.1 <sup>a</sup> | 7.1 ± 0.0 <sup>b</sup> |

Values represent mean ± standard deviation (n=3). Different letters represent significant differences within each column ( $p < 0.05$ ).

SPI: soy protein isolate; RPI: rice protein isolate; PPI: pea protein isolate; MPC: milk protein concentrate.

\* Different letters in each column represent significant difference between data ( $p < 0.05$ ).
